# Supplementary material for: Porous cerium dioxide hollow spheres and their photocatalytic performance
Source: Royal Society of Chemistry journal article supplement (doi:10.1039/c4ra12127a), 2014-01-01
Supplement: c4ra12127a1.pdf [file c4ra12127a1.pdf]

## Porous Cerium Dioxide Hollow Spheres and their Photocatalytic Performance

Saisai Yuan <sup>a,b</sup>, Qitao Zhang <sup>a,b</sup>, Bin Xu <sup>a,b,c</sup>, Zhengyuan Jin <sup>a</sup>, Ya Zhang <sup>e</sup>, Yin Yang <sup>a</sup>, Ming Zhang <sup>b,c,\*</sup>, Teruhisa Ohno <sup>a,d,\*\*</sup>

<sup>a</sup> Department of Applied Chemistry, Faculty of Engineering, Kyushu Institute of Technology, Kitakyushu 804-8550, Japan

<sup>b</sup> School of Chemistry and Chemical Engineering, Yangzhou University, Yangzhou 225002, China

<sup>c</sup> Test Center, Yangzhou University, Yangzhou 225002, China

<sup>d</sup> JST, PRESTO and ACT-C, 4-1-8 Honcho Kawaguchi, Saitama 332-0012, Japan

<sup>e</sup> School of Environmental Science and Engineering, Yangzhou University, Yangzhou 225002, China

**Photocurrent response experiment.** The prepared samples (0.03g) were dissolved into the acetone for 1h ultrasonic, and then added a grain of iodine for 30 min ultrasonic. The samples were electroplated on the surface of the ITO glass with an area of 6 cm<sup>2</sup>. The Plating voltage is 15 V, and the time of duration is 10 min. Photoelectrochemical measurements were performed with a homemade photoelectrochemical system. A 500 W Xe lamp equipped with a cutoff filter ( $\lambda > 325$  nm) was used as the irradiation source. Photocurrent was measured on an ALS 604D electrochemical workstation. Photocurrent response measurements were conducted in 1.0 M Na<sub>2</sub>SO<sub>4</sub> solution in a three-electrode system. Indium tin oxide (ITO) electrode with ceria was employed as the working electrode. A coiled Pt wire was used as the counter-electrode and a saturated Ag/AgCl as the reference electrode. The interval of light-on and light-off is 4 s.

---

\* Corresponding author at: School of Chemistry and Chemical Engineering, Yangzhou University, Yangzhou 225002, China. Tel.: +86 51487990926; fax: +86 51487979244.

\*\* Corresponding author at: Department of Applied Chemistry, Faculty of Engineering, Kyushu Institute of Technology, Kitakyushu 804-8550, Japan. Tel.: +81 93 884 3318; fax: +81 93 884 3318.

E-mail addresses: lxyzhangm@yzu.edu.cn (M. Zhang), tohno@che.kyutech.ac.jp (T. Ohno)

Image (A) ~ (D) shown the different stages of the reaction process. At the first stage, the little crystals formed, and then they aggregated into large solid spheres. Attributed to the driving force of the Ostwald ripening process, the cavity formed internally. Prolonged reaction time of system, the hollow structure obtained with an obvious interface.

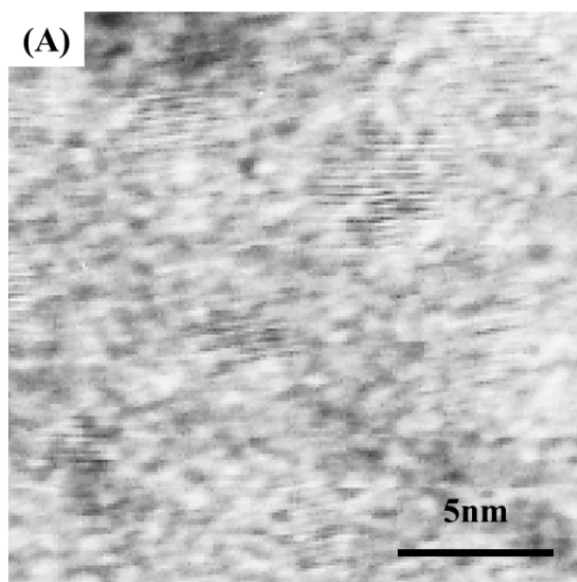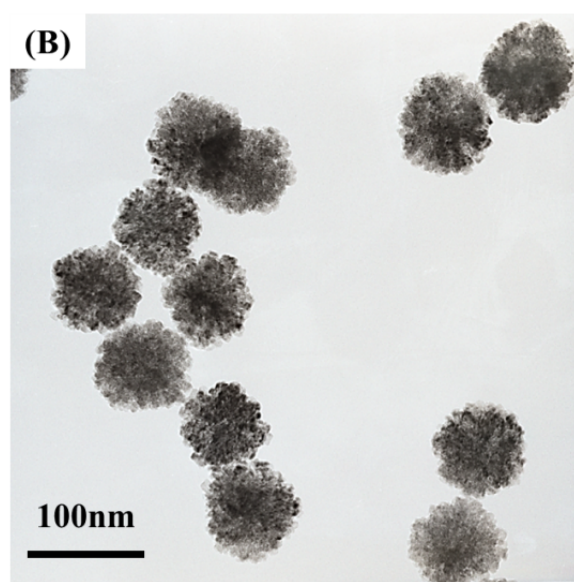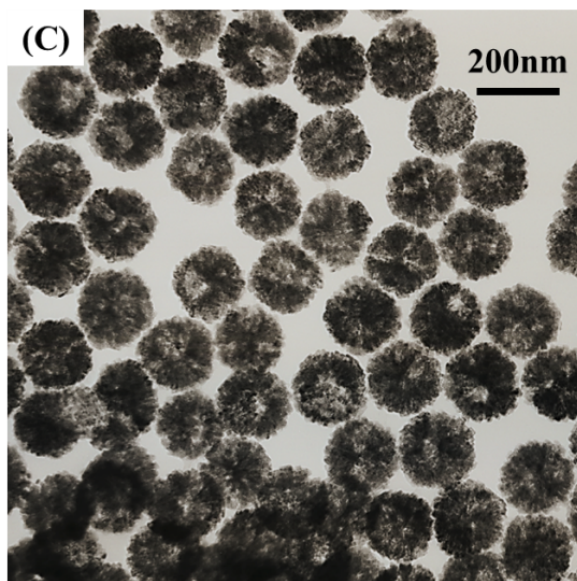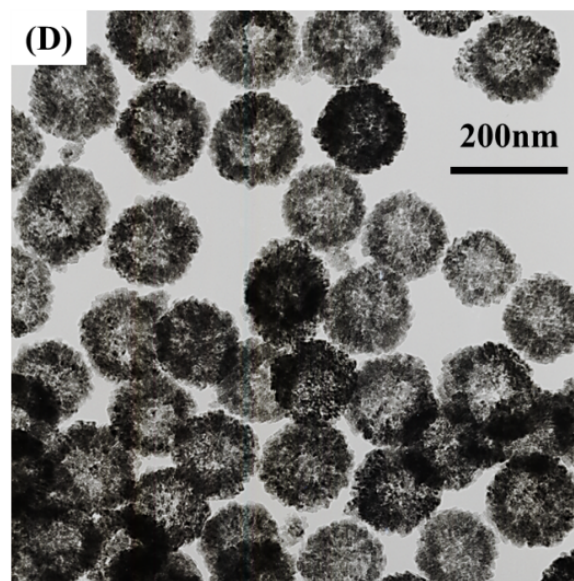

Fig S1 Formation mechanism investigation of  $\text{CeO}_2\text{-PH}$  from TEM images for the different reaction time at 180 °C (A) 0.5h (B) 3h (C) 24h (D) 48h

Sample A and B were synthesized in the mixed solution of water, ethanol and glycol; sample C and D were synthesized in the mixed solution of water and ethanol. The activity of both samples was not good, while the content of  $\text{Ce}^{3+}$  in A was higher than in B due to glycol addition. However, sample D has a special structure— Mesocrystals.<sup>[1]</sup> It is a potential research point in my future plans.

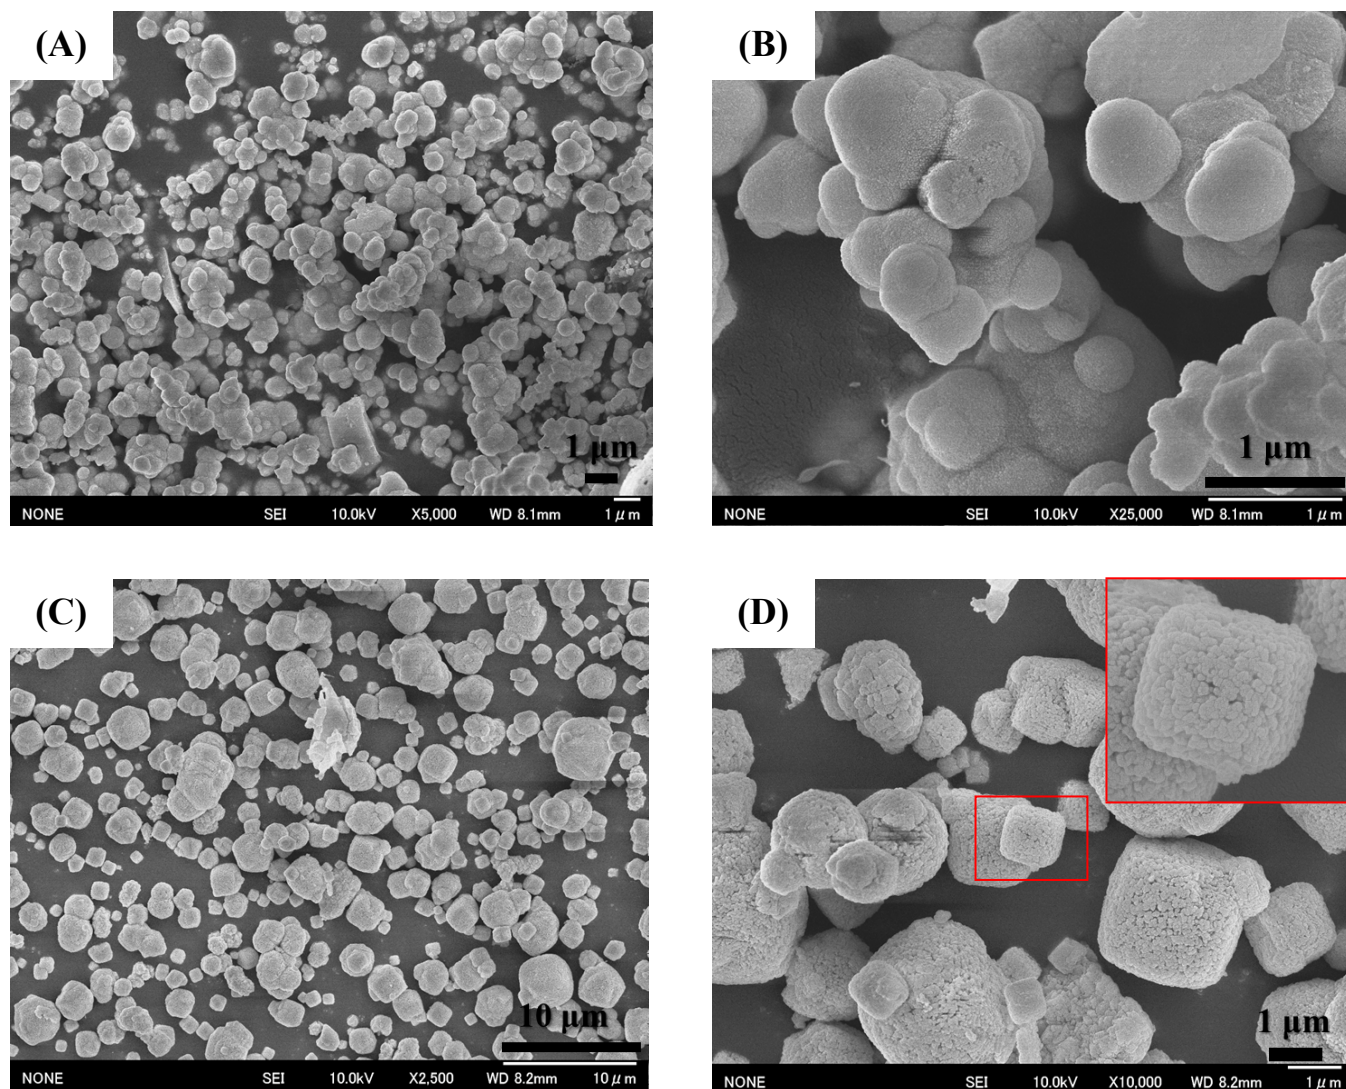

Fig S2 Prepared samples in the same condition without PVP, (A) and (B) with EG, (C) and (D) without EG.

[1]. H. Colfen and M. Antonietti, *Angewandte Chemie*, 2005, 44, 5576-5591.
